# Supplementary material
Source: Springer Nature journal article supplement (https://www.springermedizin.de/resource/supplementary/12936_2011_1972_MOESM3_ESM.pdf/9542148)
Supplement: MOESM3 [file 9542148]

```

10      20      30      40      50      60
.....|.....|.....|.....|.....|.....|
AACTAG TACACCT GGTTCAG GTGGTTCAGT TACT TCAAGTGTTCAGT TACTTCA GGTGG
Laos, MAD20 type 1 (n=95)*
Oudomxay, MAD20 type 2 (n=1)
Savannakhet, MAD20 type 3 (n=1)
Savannakhet, MAD20 type 4 (n=4)
Savannakhet, MAD20 type 5 (n=2)
Savannakhet, MAD20 type 6 (n=1)
Xekong, MAD20 type 7 (n=2)
Xekong, MAD20 type 8 (n=1)
Thai, T9/94 isolate
Cambodia, isolate Cam84I-3
Myanmar, type 6
Myanmar, type 1
Vietnam, isolate MSP157
Vietnam, isolate MSP1V49
Vietnam, isolate MSP1V43
Tanzania, isolate HN6.27
Malawi, isolate 2/040-1-6
Brazil, isolate MSP1R92
Gambia, isolate FCR3

```

```

70      80      90      100     110     120
.....|.....|.....|.....|.....|.....|
TTCAGT TACTTCA GTTGCT-----TCAGTT GCTTCAG TTGCTTCAGTTGCT TCAGT
Laos, MAD20 type 1 (n=95)*
Oudomxay, MAD20 type 2 (n=1)
Savannakhet, MAD20 type 3 (n=1)
Savannakhet, MAD20 type 4 (n=4)
Savannakhet, MAD20 type 5 (n=2)
Savannakhet, MAD20 type 6 (n=1)
Xekong, MAD20 type 7 (n=2)
Xekong, MAD20 type 8 (n=1)
Thai, T9/94 isolate
Cambodia, isolate Cam84I-3
Myanmar, type 6
Myanmar, type 1
Vietnam, isolate MSP157
Vietnam, isolate MSP1V49
Vietnam, isolate MSP1V43
Tanzania, isolate HN6.27
Malawi, isolate 2/040-1-6
Brazil, isolate MSP1R92
Gambia, isolate FCR3

```

```

130     140     150
.....|.....|.....|.....|.....|.....|
TGCTTCAGGTGGT TCA-----
Laos, MAD20 type 1 (n=95)*
Oudomxay, MAD20 type 2 (n=1)
Savannakhet, MAD20 type 3 (n=1)
Savannakhet, MAD20 type 4 (n=4)
Savannakhet, MAD20 type 5 (n=2)
Savannakhet, MAD20 type 6 (n=1)
Xekong, MAD20 type 7 (n=2)
Xekong, MAD20 type 8 (n=1)
Thai, T9/94 isolate
Cambodia, isolate Cam84I-3
Myanmar, type 6
Myanmar, type 1
Vietnam, isolate MSP157
Vietnam, isolate MSP1V49
Vietnam, isolate MSP1V43
Tanzania, isolate HN6.27
Malawi, isolate 2/040-1-6
Brazil, isolate MSP1R92
Gambia, isolate FCR3

```

\* 10 sequences of Laos, MAD20 type 1 derived from sequence analysis (2 from Oudomxay, 5 from Savannakhet and 3 from Xekong), 85 sequences were expected from SSCP screening.
